# Supplementary material for: A comprehensive evaluation of assembly scaffolding tools
Source: Springer Nature journal article supplement (doi:10.1186/gb-2014-15-3-r42), 2014-03-03

**a**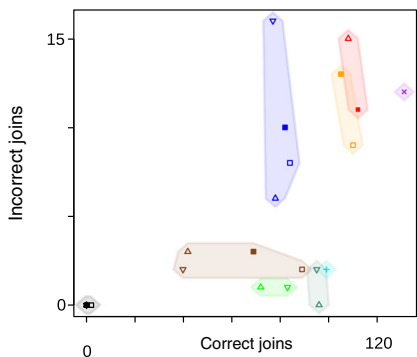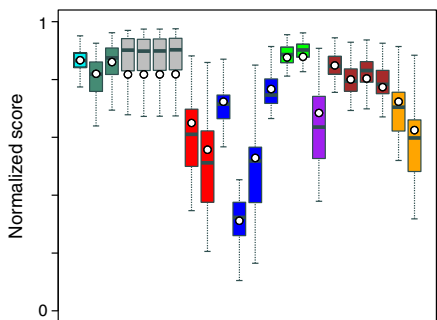**b**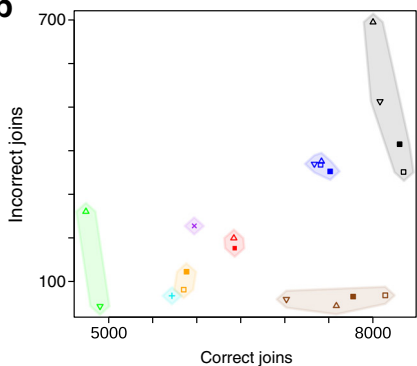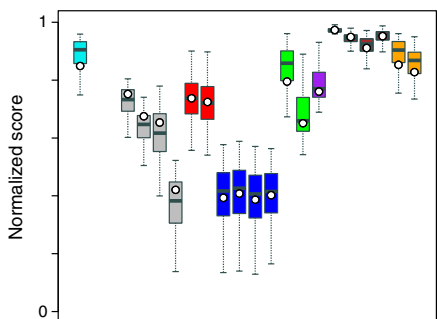**c**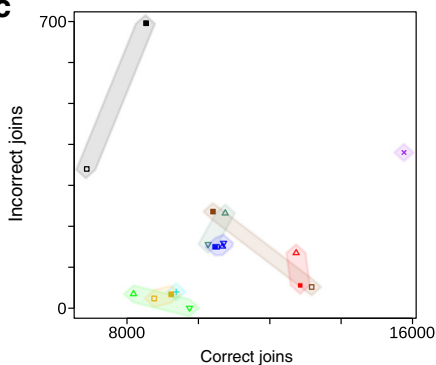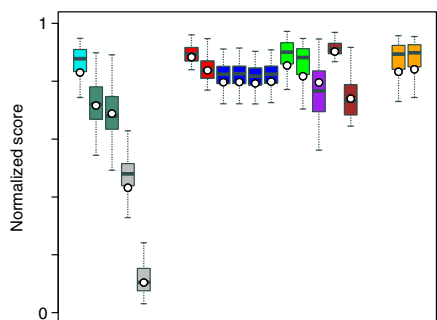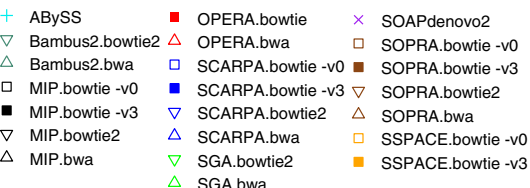

Supplement: 13059_2013_3349_MOESM5_ESM.pdf [file 13059_2013_3349_MOESM5_ESM.pdf]
